# Supplementary material
Source: PubMed Central journal article supplement (PMC2562865)
Supplement: NIHMS50293-supplement-2.pdf [file NIHMS50293-supplement-2.pdf]

***In vivo* incorporation of unnatural amino acids to probe structure,  
dynamics and ligand binding in a large protein by Nuclear Magnetic  
Resonance spectroscopy**

*Susan E. Cellitti<sup>1</sup>, David H. Jones<sup>1</sup>, Leanna Lagpacan<sup>1</sup>, Xueshi Hao<sup>1</sup>, Qiong Zhang<sup>1</sup>, Huiyong Hu<sup>1</sup>, Scott M. Brittain<sup>1</sup>, Achim Brinker<sup>1</sup>, Jeremy Caldwell<sup>1</sup>, Badry Bursulaya<sup>1</sup>, Glen Spraggon<sup>1</sup>, Ansgar Brock<sup>1</sup>, Youngha Ryu<sup>2</sup>, Tetsuo Uno<sup>1</sup>, Peter G. Schultz<sup>1,2</sup>, Bernhard H. Geierstanger<sup>1,\*</sup>*

<sup>1</sup>Genomics Institute of the Novartis Research Foundation, 10675 John Jay Hopkins Drive, San Diego, CA 92121-1125, USA

<sup>2</sup>Department of Chemistry and the Skaggs Institute for Chemical Biology, The Scripps Research Institute, 10550 North Torrey Pines Road, La Jolla, CA 92037

**Supplemental Materials**

**Table S1.** DNA sequences of selected OCF<sub>3</sub>Phe-specific tRNA synthetases. Nucleotide differences are highlighted in red and underlined. Clones labeled in Bold were evaluated further.

|                               |                                                               |     |     |     |     |     |
|-------------------------------|---------------------------------------------------------------|-----|-----|-----|-----|-----|
|                               | 1                                                             | 10  | 20  | 30  | 40  | 50  |
| All                           | ATGGACGAATTTGAAATGATAAAGAGAAACACATCTGAAATTATCAGCGAGGAAGAGTTA  |     |     |     |     |     |
|                               | 61                                                            | 70  | 80  | 90  | 100 | 110 |
| Library                       | AGAGAGGTTTTAAAAAAGATGAAAAATCTGCTNNNATAGGTTTTGAACCAAGTGGTAAA   |     |     |     |     |     |
| <b>OCF<sub>3</sub>Phe_A6</b>  | AGAGAGGTTTTAAAAAAGATGAAAAATCTGCTGCTGATAGGTTTTGAACCAAGTGGTAAA  |     |     |     |     |     |
| OCF <sub>3</sub> Phe_B6       | AGAGAGGTTTTAAAAAAGATGAAAAATCTGCTGCTATAGGTTTTGAACCAAGTGGTAAA   |     |     |     |     |     |
| <b>OCF<sub>3</sub>Phe_B7</b>  | AGAGAGGTTTTAAAAAAGATGAAAAATCTGCTGTGATAGGTTTTGAACCAAGTGGTAAA   |     |     |     |     |     |
| <b>OCF<sub>3</sub>Phe_B10</b> | AGAGAGGTTTTAAAAAAGATGAAAAATCTGCTGCTATAGGTTTTGAACCAAGTGGTAAA   |     |     |     |     |     |
| OCF <sub>3</sub> Phe_C2       | AGAGAGGTTTTAAAAAAGATGAAAAATCTGCTGTTATAGGTTTTGAACCAAGTGGTAAA   |     |     |     |     |     |
| OCF <sub>3</sub> Phe_D5       | AGAGAGGTTTTAAAAAAGATGAAAAATCTGCTGTTATAGGTTTTGAACCAAGTGGTAAA   |     |     |     |     |     |
| OCF <sub>3</sub> Phe_D9       | AGAGAGGTTTTAAAAAAGATGAAAAATCTGCTCTGATAGGTTTTGAACCAAGTGGTAAA   |     |     |     |     |     |
| OCF <sub>3</sub> Phe_E7       | AGAGAGGTTTTAAAAAAGATGAAAAATCTGCTGTGATAGGTTTTGAACCAAGTGGTAAA   |     |     |     |     |     |
| <b>OCF<sub>3</sub>Phe_F6</b>  | AGAGAGGTTTTAAAAAAGATGAAAAATCTGCTGCTATAGGTTTTGAACCAAGTGGTAAA   |     |     |     |     |     |
| OCF <sub>3</sub> Phe_F7       | AGAGAGGTTTTAAAAAAGATGAAAAATCTGCTATTATAGGTTTTGAACCAAGTGGTAAA   |     |     |     |     |     |
| OCF <sub>3</sub> Phe_F8       | AGAGAGGTTTTAAAAAAGATGAAAAATCTGCTGTGATAGGTTTTGAACCAAGTGGTAAA   |     |     |     |     |     |
| OCF <sub>3</sub> Phe_G2       | AGAGAGGTTTTAAAAAAGATGAAAAATCTGCTCATATAGGTTTTGAACCAAGTGGTAAA   |     |     |     |     |     |
| OCF <sub>3</sub> Phe_G5       | AGAGAGGTTTTAAAAAAGATGAAAAATCTGCTGTGATAGGTTTTGAACCAAGTGGTAAA   |     |     |     |     |     |
| <b>OCF<sub>3</sub>Phe_H4</b>  | AGAGAGGTTTTAAAAATAGATGAAAAATCTGCTGTGATAGGTTTTGAACCAAGTGGTAAA  |     |     |     |     |     |
|                               | 121                                                           | 130 | 140 | 150 | 160 | 170 |
| All                           | ATACATTTAGGGCATTATCTCCAAATAAAAAAGATGATTGATTTACAAAATGCTGGATTT  |     |     |     |     |     |
|                               | 181                                                           | 190 | 200 | 210 | 220 | 230 |
| Library                       | GATATAATTATAANNNTTGGCTGATTTANNNGCCTATTTAAACCAGAAAGGAGAGTTGGAT |     |     |     |     |     |
| <b>OCF<sub>3</sub>Phe_A6</b>  | GATATAATTATAGCTTTGGCTGATTTACACGCCTATTTAAACCAGAAAGGAGAGTTGGAT  |     |     |     |     |     |
| OCF <sub>3</sub> Phe_B6       | GATATAATTATAGCGTTGGCTGATTTACACGCCTATTTAAACCAGAAAGGAGAGTTGGAT  |     |     |     |     |     |
| <b>OCF<sub>3</sub>Phe_B7</b>  | GATATAATTATACCTTTGGCTGATTTACACGCCTATTTAAACCAGAAAGGAGAGTTGGAT  |     |     |     |     |     |
| <b>OCF<sub>3</sub>Phe_B10</b> | GATATAATTATAGCTTTGGCTGATTTACATGCCTATTTAAACCAGAAAGGAGAGTTGGAT  |     |     |     |     |     |
| OCF <sub>3</sub> Phe_C2       | GATATAATTATTAGGTTTGGCTGATTTACACGCCTATTTAAACCAGAAAGGAGAGTTGGAT |     |     |     |     |     |
| OCF <sub>3</sub> Phe_D5       | GATATAATTATACATTTGGCTGATTTACACGCCTATTTAAACCAGAAAGGAGAGTTGGAT  |     |     |     |     |     |
| OCF <sub>3</sub> Phe_D9       | GATATAATTATACCGTTGGCTGATTTACATGCCTATTTAAACCAGAAAGGAGAGTTGGAT  |     |     |     |     |     |
| OCF <sub>3</sub> Phe_E7       | GATATAATTATATCGTTGGCTGATTTACACGCCTATTTAAACCAGAAAGGAGAGTTGGAT  |     |     |     |     |     |
| <b>OCF<sub>3</sub>Phe_F6</b>  | GATATAATTATAGTTTGGCTGATTTACACGCCTATTTAAACCAGAAAGGAGAGTTGGAT   |     |     |     |     |     |
| OCF <sub>3</sub> Phe_F7       | GATATAATTATAACTTTGGCTGATTTACACGCCTATTTAAACCAGAAAGGAGAGTTGGAT  |     |     |     |     |     |
| OCF <sub>3</sub> Phe_F8       | GATATAATTATACAGTTGGCTGATTTACATGCCTATTTAAACCAGAAAGGAGAGTTGGAT  |     |     |     |     |     |
| OCF <sub>3</sub> Phe_G2       | GATATAATTATAGCGTTGGCTGATTTAATGCCTATTTAAACCAGAAAGGAGAGTTGGAT   |     |     |     |     |     |
| OCF <sub>3</sub> Phe_G5       | GATATAATTATAACTTTGGCTGATTTACACGCCTATTTAAACCAGAAAGGAGAGTTGGAT  |     |     |     |     |     |
| <b>OCF<sub>3</sub>Phe_H4</b>  | GATATAATTATAGGGTTGGCTGATTTACACGCCTATTTAAACCAGAAAGGAGAGTTGGAT  |     |     |     |     |     |
|                               | 241                                                           | 250 | 260 | 270 | 280 | 290 |
| All                           | GAGATTAGAAAAATAGGAGATTATAACAAAAAAGTTTTTGAAGCAATGGGGTTAAAGGCA  |     |     |     |     |     |
|                               | 301                                                           | 310 | 320 | 330 | 340 | 350 |
| Library                       | AAATATGTTTATGGAAGTGAAANNNNNNCTTGATAAGGATTATACACTGAATGTCTATAGA |     |     |     |     |     |
| <b>OCF<sub>3</sub>Phe_A6</b>  | AAATATGTTTATGGAAGTGAAAGTGGCTTGATAAGGATTATACACTGAATGTCTATAGA   |     |     |     |     |     |
| OCF <sub>3</sub> Phe_B6       | AAATATGTTTATGGAAGTGAAAGTGGCTTGATAAGGATTATACACTGAATGTCTATAGA   |     |     |     |     |     |
| <b>OCF<sub>3</sub>Phe_B7</b>  | AAATATGTTTATGGAAGTGAAAGTGGCTTGATAAGGATTATACACTGAATGTCTATAGA   |     |     |     |     |     |
| <b>OCF<sub>3</sub>Phe_B10</b> | AAATATGTTTATGGAAGTGAAAGTGGCTTGATAAGGATTATACACTGAATGTCTATAGA   |     |     |     |     |     |
| OCF <sub>3</sub> Phe_C2       | AAATATGTTTATGGAAGTGAAAGTGGCTTGATAAGGATTATACACTGAATGTCTATAGA   |     |     |     |     |     |
| OCF <sub>3</sub> Phe_D5       | AAATATGTTTATGGAAGTGAAAGTGGCTTGATAAGGATTATACACTGAATGTCTATAGA   |     |     |     |     |     |
| OCF <sub>3</sub> Phe_D9       | AAATATGTTTATGGAAGTGAAAGTGGCTTGATAAGGATTATACACTGAATGTCTATAGA   |     |     |     |     |     |
| OCF <sub>3</sub> Phe_E7       | AAATATGTTTATGGAAGTGAAAGTGGCTTGATAAGGATTATACACTGAATGTCTATAGA   |     |     |     |     |     |
| <b>OCF<sub>3</sub>Phe_F6</b>  | AAATATGTTTATGGAAGTGAAAGTGGCTTGATAAGGATTATACACTGAATGTCTATAGA   |     |     |     |     |     |
| OCF <sub>3</sub> Phe_F7       | AAATATGTTTATGGAAGTGAAAGTGGCTTGATAAGGATTATACACTGAATGTCTATAGA   |     |     |     |     |     |
| OCF <sub>3</sub> Phe_F8       | AAATATGTTTATGGAAGTGAAAGTGGCTTGATAAGGATTATACACTGAATGTCTATAGA   |     |     |     |     |     |
| OCF <sub>3</sub> Phe_G2       | AAATATGTTTATGGAAGTGAAAGTGGCTTGATAAGGATTATACACTGAATGTCTATAGA   |     |     |     |     |     |
| OCF <sub>3</sub> Phe_G5       | AAATATGTTTATGGAAGTGAAAGTGGCTTGATAAGGATTATACACTGAATGTCTATAGA   |     |     |     |     |     |
| <b>OCF<sub>3</sub>Phe_H4</b>  | AAATATGTTTATGGAAGTGAAAGTGGCTTGATAAGGATTATACACTGAATGTCTATAGA   |     |     |     |     |     |

**Table S1.** Continuation.

|                               |                                                               |     |     |     |     |     |
|-------------------------------|---------------------------------------------------------------|-----|-----|-----|-----|-----|
|                               | 361                                                           | 370 | 380 | 390 | 400 | 410 |
| All                           | TTGGCTTTAAAACTACCTTAAAAAGAGCAAGAAGGAGTATGGAACTTATAGCAAGAGAG   |     |     |     |     |     |
|                               | 421                                                           | 430 | 440 | 450 | 460 | 470 |
| Library                       | GATGAAAATCCAAAGGTTGCTGAAGTTATCTATCCAATAATGNNNGTTAATNNNNNNCAT  |     |     |     |     |     |
| <b>OCF<sub>3</sub>Phe_A6</b>  | GATGAAAATCCAAAGGTTGCTGAAGTTATCTATCCAATAATGCAGGTTAATGCGATT     |     |     |     |     |     |
| OCF <sub>3</sub> Phe_B6       | GATGAAAATCCAAAGGTTGCTGAAGTTATCTATCCAATAATGCAGGTTAATGGTATT     |     |     |     |     |     |
| <b>OCF<sub>3</sub>Phe_B7</b>  | GATGAAAATCCAAAGGTTGCTGAAGTTATCTATCCAATAATGCAGGTTAATGGGATT     |     |     |     |     |     |
| <b>OCF<sub>3</sub>Phe_B10</b> | GATGAAAATCCAAAGGTTGCTGAAGTTATCTATCCAATAATGCAGGTTAATGGTAAT     |     |     |     |     |     |
| OCF <sub>3</sub> Phe_C2       | GATGAAAATCCAAAGGTTGCTGAAGTTATCTATCCAATAATGCAGGTTAATGGGATT     |     |     |     |     |     |
| OCF <sub>3</sub> Phe_D5       | GATGAAAATCCAAAGGTTGCTGAAGTTATCTATCCAATAATGCAGGTTAATTCTATT     |     |     |     |     |     |
| OCF <sub>3</sub> Phe_D9       | GATGAAAATCCAAAGGTTGCTGAAGTTATCTATCCAATAATGCAGGTTAATGGTGCT     |     |     |     |     |     |
| OCF <sub>3</sub> Phe_E7       | GATGAAAATCCAAAGGTTGCTGAAGTTATCTATCCAATAATGCAGGTTAATGCGATT     |     |     |     |     |     |
| <b>OCF<sub>3</sub>Phe_F6</b>  | GATGAAAATCCAAAGGTTGCTGAAGTTATCTATCCAATAATGCAGGTTAATGCGATT     |     |     |     |     |     |
| OCF <sub>3</sub> Phe_F7       | GATGAAAATCCAAAGGTTGCTGAAGTTATCTATCCAATAATGCAGGTTAATGCGATT     |     |     |     |     |     |
| OCF <sub>3</sub> Phe_F8       | GATGAAAATCCAAAGGTTGCTGAAGTTATCTATCCAATAATGTCGGTTAATAGTGTG     |     |     |     |     |     |
| OCF <sub>3</sub> Phe_G2       | GATGAAAATCCAAAGGTTGCTGAAGTTATCTATCCAATAATGCAGGTTAATGGTGCC     |     |     |     |     |     |
| OCF <sub>3</sub> Phe_G5       | GATGAAAATCCAAAGGTTGCTGAAGTTATCTATCCAATAATGCAGGTTAATTCGATT     |     |     |     |     |     |
| <b>OCF<sub>3</sub>Phe_H4</b>  | GATGAAAATCCAAAGGTTGCTGAAGTTATCTATCCAATAATGCAGGTTAATGCTATT     |     |     |     |     |     |
|                               | 481                                                           | 490 | 500 | 510 | 520 | 530 |
| Library                       | TATNNNGGCGTTGATGTTGCAGTTGGAGGGATGGAGCAGAGAAAAATACACATGTTAGCA  |     |     |     |     |     |
| <b>OCF<sub>3</sub>Phe_A6</b>  | TATAAGGGCGTTGATGTTGCAGTTGGAGGGATGGAGCAGAGAAAAATACACATGTTAGCA  |     |     |     |     |     |
| OCF <sub>3</sub> Phe_B6       | TATGTTGGCGTTGATGTTGCAGTTGGAGGGATGGAGCAGAGAAAAATACACATGTTAGCA  |     |     |     |     |     |
| <b>OCF<sub>3</sub>Phe_B7</b>  | TATCAGGGCGTTGATGTTGCAGTTGGAGGGATGGAGCAGAGAAAAATACACATGTTAGCA  |     |     |     |     |     |
| <b>OCF<sub>3</sub>Phe_B10</b> | TATCTTGGCGTTGATGTTGCAGTTGGAGGGATGGAGCAGAGAAAAATACACATGTTAGCA  |     |     |     |     |     |
| OCF <sub>3</sub> Phe_C2       | TATGTGGGCGTTGATGTTGCAGTTGGAGGGATGGAGCAGAGAAAAATACACATGTTAGCA  |     |     |     |     |     |
| OCF <sub>3</sub> Phe_D5       | TATAGTGGCGTTGATGTTGCAGTTGGAGGGATGGAGCAGAGAAAAATACACATGTTAGCA  |     |     |     |     |     |
| OCF <sub>3</sub> Phe_D9       | TATCTTGGCGTTGATGTTGCAGTTGGAGGGATGGAGCAGAGAAAAATACACATGTTAGCA  |     |     |     |     |     |
| OCF <sub>3</sub> Phe_E7       | TATGTGGGCGTTGATGTTGCAGTTGGAGGGATGGAGCAGAGAAAAATACACATGTTAGCA  |     |     |     |     |     |
| <b>OCF<sub>3</sub>Phe_F6</b>  | TATTATGGCGTTGATGTTGCAGTTGGAGGGATGGAGCAGAGAAAAATACACATGTTAGCA  |     |     |     |     |     |
| OCF <sub>3</sub> Phe_F7       | TATCTTGGCGTTGATGTTGCAGTTGGAGGGATGGAGCAGAGAAAAATACACATGTTAGCA  |     |     |     |     |     |
| OCF <sub>3</sub> Phe_F8       | TATCATGGCGTTGATGTTGCAGTTGGAGGGATGGAGCAGAGAAAAATACACATGTTAGCA  |     |     |     |     |     |
| OCF <sub>3</sub> Phe_G2       | TATCTTGGGTTGATGTTGCAGTTGGAGGGATGGAGCAGAGAAAAATACACATGTTAGCA   |     |     |     |     |     |
| OCF <sub>3</sub> Phe_G5       | TATAGTGGCGTTGATGTTGCAGTTGGAGGGATGGAGCAGAGAAAAATACACATGTTAGCA  |     |     |     |     |     |
| <b>OCF<sub>3</sub>Phe_H4</b>  | TATCATGGCGTTGATGTTGCAGTTGGAGGGATGGAGCAGAGAAAAATACACATGTTAGCA  |     |     |     |     |     |
|                               | 541                                                           | 550 | 560 | 570 | 580 | 590 |
| All                           | AGGGAGCTTTTACAAAAAAGGTTGTTTGTATTCAACCCCTGTCTTAACGGGTTTGGAT    |     |     |     |     |     |
|                               | 601                                                           | 610 | 620 | 630 | 640 | 650 |
| All                           | GGAGAAGGAAAGATGAGTTCTTCAAAAGGGAATTTTATAGCTGTTGATGACTCTCCAGAA  |     |     |     |     |     |
|                               | 661                                                           | 670 | 680 | 690 | 700 | 710 |
| All                           | GAGATTAGGGCTAAGATAAAGAAAGCATACTGCCAGCTGGAGTTGTTGAAGGAAATCCA   |     |     |     |     |     |
|                               | 721                                                           | 730 | 740 | 750 | 760 | 770 |
| All                           | ATAATGGAGATAGCTAAATACTTCCCTTGAATATCCTTTAACCATAAAAAAGGCCAGAAAA |     |     |     |     |     |
|                               | 781                                                           | 790 | 800 | 810 | 820 | 830 |
| All                           | TTTGGTGGAGATTTGACAGTTAATAGCTATGAGGAGTTAGAGAGTTTATTTAAAAATAAG  |     |     |     |     |     |
|                               | 841                                                           | 850 | 860 | 870 | 880 | 890 |
| All                           | GAATTGCATCCAATGGATTTAAAAAATGCTGTAGCTGAAGAACTTATAAGATTTTAGAG   |     |     |     |     |     |
|                               | 901                                                           | 910 | 920 |     |     |     |
| All                           | CCAATTAGAAAGAGATTATAA                                         |     |     |     |     |     |

**Table S2.** Protein sequences of selected OCF<sub>3</sub>Phe-specific tRNA synthetases. Amino acid differences are highlighted in red and underlined. Clones labeled in Bold were evaluated further.

|                               |                      |                      |                   |                      |              |                                        |
|-------------------------------|----------------------|----------------------|-------------------|----------------------|--------------|----------------------------------------|
|                               | 1                    | 10                   | 20                | 30                   | 40           | 50                                     |
| Library                       | MDEFEMIKRNTSEI       | I                    | SEEEELREVLK       | KKDEKSA              | <u>X</u>     | IGFEPSPGKIHLGHYLQIKKMIDLQNAGF          |
| <b>OCF<sub>3</sub>PHE_A6</b>  | MDEFEMIKRNTSEI       | I                    | SEEEELREVLK       | KKDEKSA              | <u>V</u>     | IGFEPSPGKIHLGHYLQIKKMIDLQNAGF          |
| OCF <sub>3</sub> PHE_B6       | MDEFEMIKRNTSEI       | I                    | SEEEELREVLK       | KKDEKSA              | <u>A</u>     | IGFEPSPGKIHLGHYLQIKKMIDLQNAGF          |
| <b>OCF<sub>3</sub>PHE_B7</b>  | MDEFEMIKRNTSEI       | I                    | SEEEELREVLK       | KKDEKSA              | <u>V</u>     | IGFEPSPGKIHLGHYLQIKKMIDLQNAGF          |
| <b>OCF<sub>3</sub>PHE_B10</b> | MDEFEMIKRNTSEI       | I                    | SEEEELREVLK       | KKDEKSA              | <u>A</u>     | IGFEPSPGKIHLGHYLQIKKMIDLQNAGF          |
| OCF <sub>3</sub> PHE_C2       | MDEFEMIKRNTSEI       | I                    | SEEEELREVLK       | KKDEKSA              | <u>V</u>     | IGFEPSPGKIHLGHYLQIKKMIDLQNAGF          |
| OCF <sub>3</sub> PHE_D5       | MDEFEMIKRNTSEI       | I                    | SEEEELREVLK       | KKDEKSA              | <u>V</u>     | IGFEPSPGKIHLGHYLQIKKMIDLQNAGF          |
| OCF <sub>3</sub> PHE_D9       | MDEFEMIKRNTSEI       | I                    | SEEEELREVLK       | KKDEKSA              | <u>L</u>     | IGFEPSPGKIHLGHYLQIKKMIDLQNAGF          |
| OCF <sub>3</sub> PHE_E7       | MDEFEMIKRNTSEI       | I                    | SEEEELREVLK       | KKDEKSA              | <u>V</u>     | IGFEPSPGKIHLGHYLQIKKMIDLQNAGF          |
| <b>OCF<sub>3</sub>PHE_F6</b>  | MDEFEMIKRNTSEI       | I                    | SEEEELREVLK       | KKDEKSA              | <u>A</u>     | IGFEPSPGKIHLGHYLQIKKMIDLQNAGF          |
| OCF <sub>3</sub> PHE_F7       | MDEFEMIKRNTSEI       | I                    | SEEEELREVLK       | KKDEKSA              | <u>I</u>     | IGFEPSPGKIHLGHYLQIKKMIDLQNAGF          |
| OCF <sub>3</sub> PHE_F8       | MDEFEMIKRNTSEI       | I                    | SEEEELREVLK       | KKDEKSA              | <u>V</u>     | IGFEPSPGKIHLGHYLQIKKMIDLQNAGF          |
| OCF <sub>3</sub> PHE_G2       | MDEFEMIKRNTSEI       | I                    | SEEEELREVLK       | KKDEKSA              | <u>H</u>     | IGFEPSPGKIHLGHYLQIKKMIDLQNAGF          |
| OCF <sub>3</sub> PHE_G5       | MDEFEMIKRNTSEI       | I                    | SEEEELREVLK       | KKDEKSA              | <u>V</u>     | IGFEPSPGKIHLGHYLQIKKMIDLQNAGF          |
| <b>OCF<sub>3</sub>PHE_H4</b>  | MDEFEMIKRNTSEI       | I                    | SEEEELREVLK       | <u>I</u>             | DEKSA        | <u>V</u> IGFEPSPGKIHLGHYLQIKKMIDLQNAGF |
|                               | 61                   | 70                   | 80                | 90                   | 100          | 110                                    |
| Library                       | DIIIXLADL            | XAYLNQK              | GELDEIRKIGDYNK    | KVFEAMGLKAKYVY       | GSE          | <u>XX</u> LDDKDYTLNVYR                 |
| <b>OCF<sub>3</sub>PHE_A6</b>  | DIIIALADL            | HAYLNQK              | GELDEIRKIGDYNK    | KVFEAMGLKAKYVY       | GSE          | <u>QW</u> LDDKDYTLNVYR                 |
| OCF <sub>3</sub> PHE_B6       | DIIIALADL            | HAYLNQK              | GELDEIRKIGDYNK    | KVFEAMGLKAKYVY       | GSE          | <u>KW</u> LDDKDYTLNVYR                 |
| <b>OCF<sub>3</sub>PHE_B7</b>  | DIIILADL             | HAYLNQK              | GELDEIRKIGDYNK    | KVFEAMGLKAKYVY       | GSE          | <u>AW</u> LDDKDYTLNVYR                 |
| <b>OCF<sub>3</sub>PHE_B10</b> | DIIIALADL            | HAYLNQK              | GELDEIRKIGDYNK    | KVFEAMGLKAKYVY       | GSE          | <u>WM</u> LDDKDYTLNVYR                 |
| OCF <sub>3</sub> PHE_C2       | DIIILGLADL           | HAYLNQK              | GELDEIRKIGDYNK    | KVFEAMGLKAKYVY       | GSE          | <u>EW</u> LDDKDYTLNVYR                 |
| OCF <sub>3</sub> PHE_D5       | DIIIHHLADL           | HAYLNQK              | GELDEIRKIGDYNK    | KVFEAMGLKAKYVY       | GSE          | <u>EP</u> LDDKDYTLNVYR                 |
| OCF <sub>3</sub> PHE_D9       | DIIIPLADL            | HAYLNQK              | GELDEIRKIGDYNK    | KVFEAMGLKAKYVY       | GSE          | <u>WM</u> LDDKDYTLNVYR                 |
| OCF <sub>3</sub> PHE_E7       | DIIISLADL            | HAYLNQK              | GELDEIRKIGDYNK    | KVFEAMGLKAKYVY       | GSE          | <u>TQ</u> LDDKDYTLNVYR                 |
| <b>OCF<sub>3</sub>PHE_F6</b>  | DIIISLADL            | HAYLNQK              | GELDEIRKIGDYNK    | KVFEAMGLKAKYVY       | GSE          | <u>QA</u> LDDKDYTLNVYR                 |
| OCF <sub>3</sub> PHE_F7       | DIIITLADL            | HAYLNQK              | GELDEIRKIGDYNK    | KVFEAMGLKAKYVY       | GSE          | <u>RW</u> LDDKDYTLNVYR                 |
| OCF <sub>3</sub> PHE_F8       | DIIITQLADL           | HAYLNQK              | GELDEIRKIGDYNK    | KVFEAMGLKAKYVY       | GSE          | <u>RE</u> LDDKDYTLNVYR                 |
| OCF <sub>3</sub> PHE_G2       | DIIIALADL            | NAYLNQK              | GELDEIRKIGDYNK    | KVFEAMGLKAKYVY       | GSE          | <u>WM</u> LDDKDYTLNVYR                 |
| OCF <sub>3</sub> PHE_G5       | DIIITLADL            | HAYLNQK              | GELDEIRKIGDYNK    | KVFEAMGLKAKYVY       | GSE          | <u>LG</u> LDDKDYTLNVYR                 |
| <b>OCF<sub>3</sub>PHE_H4</b>  | DIIIGLADL            | HAYLNQK              | GELDEIRKIGDYNK    | KVFEAMGLKAKYVY       | GSE          | <u>HY</u> LDDKDYTLNVYR                 |
|                               | 121                  | 130                  | 140               | 150                  | 160          | 170                                    |
| Library                       | LAKTTLKRARRSMELIARE  | DENPKVAEVIY          | IPIM              | <u>XV</u> N          | <u>XX</u> HY | <u>X</u> GVDDAVGGMEQRKIHMLA            |
| <b>OCF<sub>3</sub>PHE_A6</b>  | LAKTTLKRARRSMELIARE  | DENPKVAEVIY          | IPIM              | <u>QV</u> N          | <u>AI</u> HY | <u>K</u> GVDDAVGGMEQRKIHMLA            |
| OCF <sub>3</sub> PHE_B6       | LAKTTLKRARRSMELIARE  | DENPKVAEVIY          | IPIM              | <u>QV</u> N          | <u>GI</u> HY | <u>V</u> GVDDAVGGMEQRKIHMLA            |
| <b>OCF<sub>3</sub>PHE_B7</b>  | LAKTTLKRARRSMELIARE  | DENPKVAEVIY          | IPIM              | <u>QV</u> N          | <u>GI</u> HY | <u>Q</u> GVDDAVGGMEQRKIHMLA            |
| <b>OCF<sub>3</sub>PHE_B10</b> | LAKTTLKRARRSMELIARE  | DENPKVAEVIY          | IPIM              | <u>QV</u> N          | <u>GN</u> HY | <u>L</u> GVDDAVGGMEQRKIHMLA            |
| OCF <sub>3</sub> PHE_C2       | LAKTTLKRARRSMELIARE  | DENPKVAEVIY          | IPIM              | <u>QV</u> N          | <u>GI</u> HY | <u>V</u> GVDDAVGGMEQRKIHMLA            |
| OCF <sub>3</sub> PHE_D5       | LAKTTLKRARRSMELIARE  | DENPKVAEVIY          | IPIM              | <u>QV</u> N          | <u>SI</u> HY | <u>S</u> GVDDAVGGMEQRKIHMLA            |
| OCF <sub>3</sub> PHE_D9       | LAKTTLKRARRSMELIARE  | DENPKVAEVIY          | IPIM              | <u>QV</u> N          | <u>GA</u> HY | <u>L</u> GVDDAVGGMEQRKIHMLA            |
| OCF <sub>3</sub> PHE_E7       | LAKTTLKRARRSMELIARE  | DENPKVAEVIY          | IPIM              | <u>QV</u> N          | <u>AI</u> HY | <u>V</u> GVDDAVGGMEQRKIHMLA            |
| <b>OCF<sub>3</sub>PHE_F6</b>  | LAKTTLKRARRSMELIARE  | DENPKVAEVIY          | IPIM              | <u>QV</u> N          | <u>AI</u> HY | <u>Y</u> GVDDAVGGMEQRKIHMLA            |
| OCF <sub>3</sub> PHE_F7       | LAKTTLKRARRSMELIARE  | DENPKVAEVIY          | IPIM              | <u>QV</u> N          | <u>AI</u> HY | <u>S</u> GVDDAVGGMEQRKIHMLA            |
| OCF <sub>3</sub> PHE_F8       | LAKTTLKRARRSMELIARE  | DENPKVAEVIY          | IPIM              | <u>SV</u> N          | <u>SV</u> HY | <u>H</u> GVDDAVGGMEQRKIHMLA            |
| OCF <sub>3</sub> PHE_G2       | LAKTTLKRARRSMELIARE  | DENPKVAEVIY          | IPIM              | <u>QV</u> N          | <u>GA</u> HY | <u>L</u> GVDDAVGGMEQRKIHMLA            |
| OCF <sub>3</sub> PHE_G5       | LAKTTLKRARRSMELIARE  | DENPKVAEVIY          | IPIM              | <u>QV</u> N          | <u>SI</u> HY | <u>S</u> GVDDAVGGMEQRKIHMLA            |
| <b>OCF<sub>3</sub>PHE_H4</b>  | LAKTTLKRARRSMELIARE  | DENPKVAEVIY          | IPIM              | <u>QV</u> N          | <u>AI</u> HY | <u>H</u> GVDDAVGGMEQRKIHMLA            |
|                               | 181                  | 190                  | 200               | 210                  | 220          | 230                                    |
| All                           | RELLPKKVVCIHNPVLTGLD | GEGKMSSSKGNFIAV      | DDSP              | EIRAKIKKAYCPAGVVEGNP |              |                                        |
|                               | 241                  | 250                  | 260               | 270                  | 280          | 290                                    |
| All                           | NFIAVDDSP            | EIRAKIKKAYCPAGVVEGNP | IMEIAKYFLEYPLTIKR | PEKFGGDLTVNSY        |              |                                        |
|                               | 301                  | 310                  | 320               | 330                  |              |                                        |
| All                           | EEESL                | FKNKELHPMDLKN        | VAEELIKILEPIRKRLZ |                      |              |                                        |

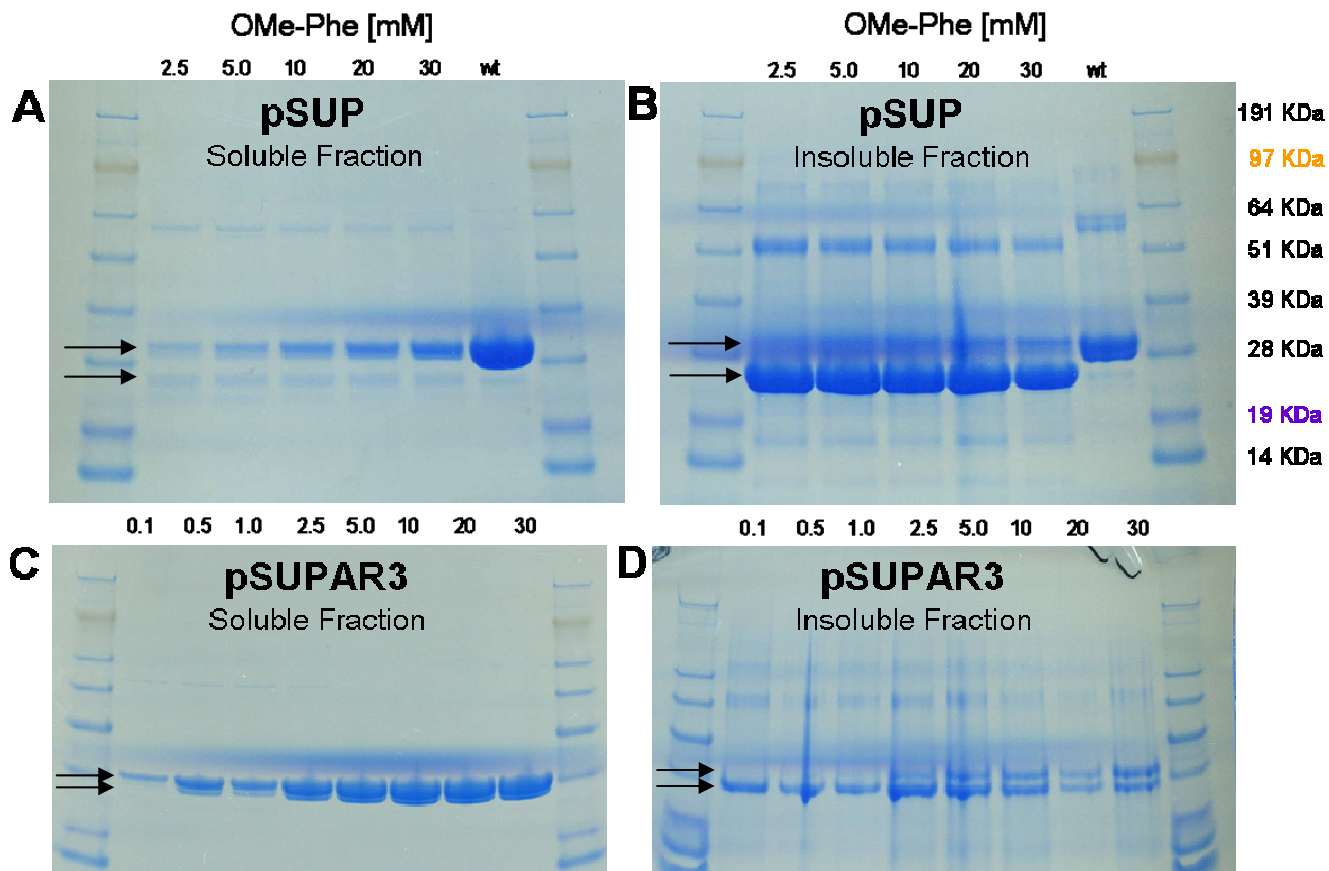

**Figure S1.** Incorporation of L-OMePhe into FAS-TE Tyr<sup>2454</sup>TAG using pSUP<sup>13</sup> (A and B) and pSUPAR3 (C and D). SDS gels of proteins purified by Nickel affinity chromatography from the soluble fraction of cell lysate (A and C) or after extraction of the insoluble pellet with 6 M guanidinium hydrochloride (B and D). 50 mL of *E. coli* culture were grown in TB media at various concentrations of OMePhe. Wild-type FAS-TE was expressed in the presence of the pSUP plasmid carrying the tRNA/tRNA synthetase pair and of 2.5 mM L-OMePhe. Truncated and full-length FAS-TE mutants are indicated by arrows and the size was confirmed by mass spectrometry. The soluble fractions generated with pSUPAR3 do not contain any detectable amounts of truncated FAS-TE as monitored by mass spectrometry.

**A**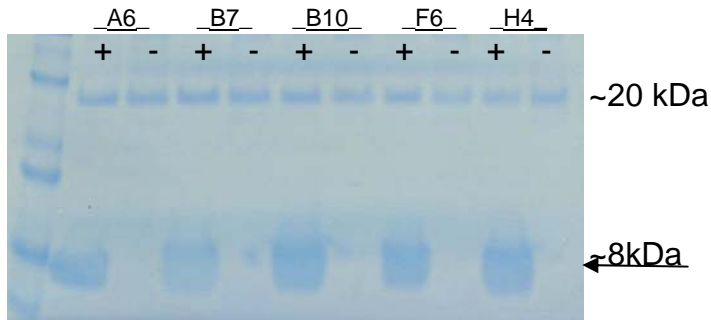**B**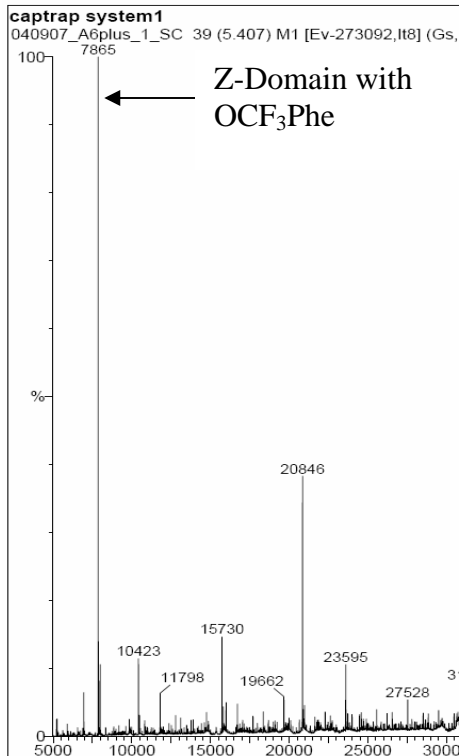**C**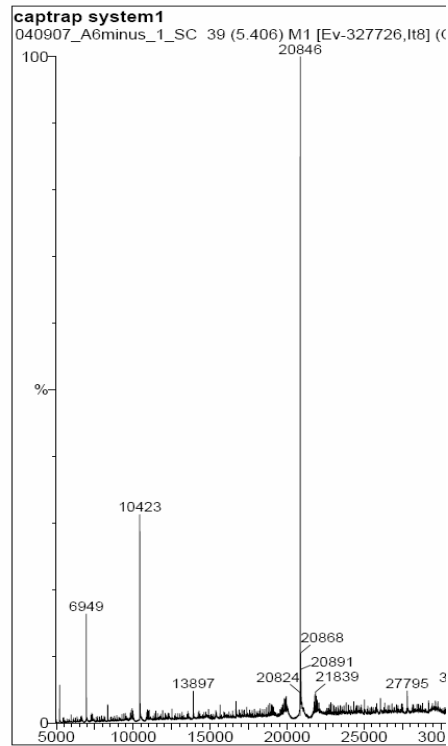

**Figure S2.** SDS-Gel (A) and ESI-MS spectra (B and C) of Z-domain expression with and without OCF<sub>3</sub>Phe. (A) Incorporation of OCF<sub>3</sub>Phe into residue 7 of Z-domain using different OCF<sub>3</sub>Phe RS mutants (labeled by their clone number A6, B7, B10, F6 or H4) results in a band at approximately 8 kDa consistent with the expected mass of 7866 Da. The observed mass in the ESI-MS spectrum is 7865 Da (arrow, B). A contaminating *E. coli* protein of 20,846 Da (~20 kD gel band in A) is observed in all samples. In the absence of OCF<sub>3</sub>Phe, full-length Z-domain is not observed. The resulting truncated TSVDN peptide is not observed in the SDS-gel (A) or in the ESI-MS spectra (C).

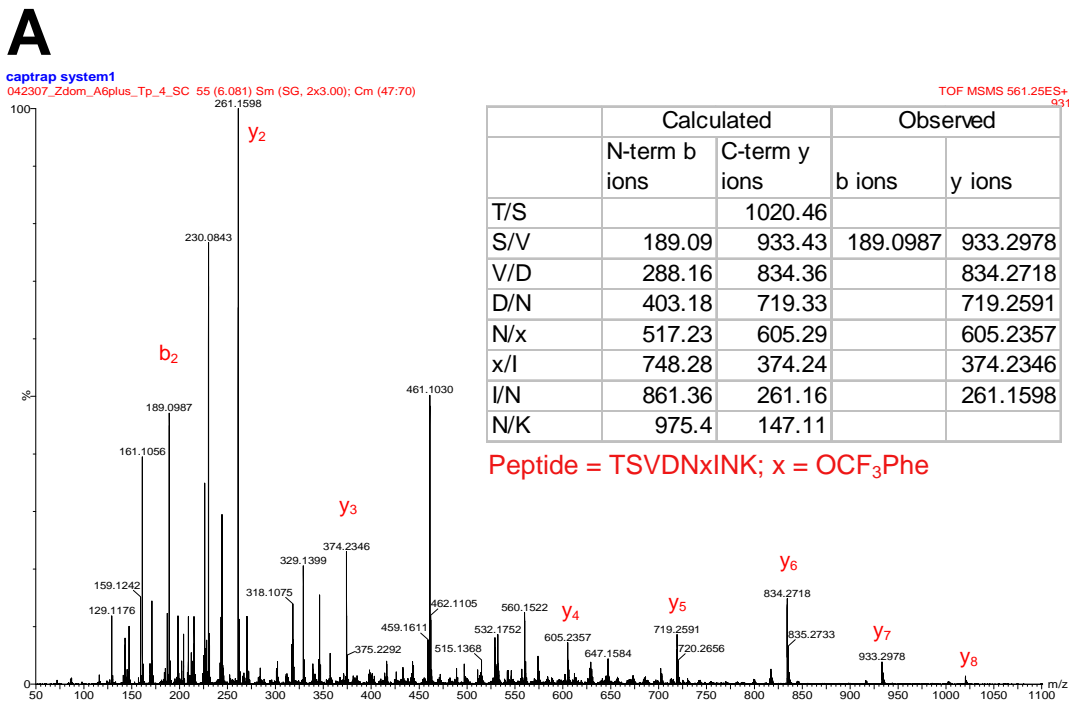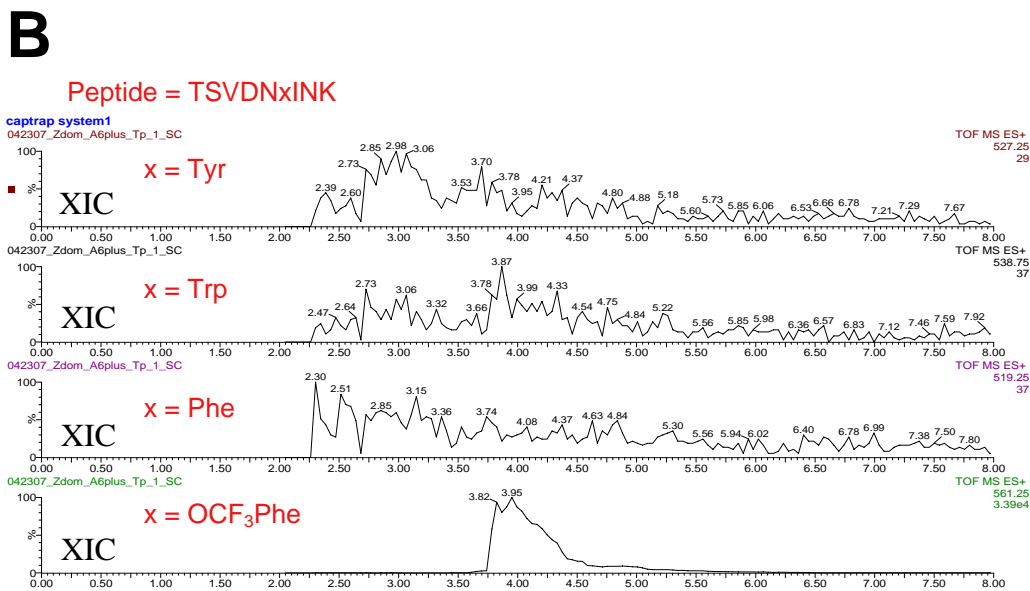

**Figure S3.** LC-ESI-MS analysis of tryptic digests of Z-domain with OCF<sub>3</sub>Phe incorporated. (A) ESI-MS-MS analysis verifies incorporation of OCF<sub>3</sub>Phe at the desired location in the tryptic peptide TSVDN(OCF<sub>3</sub>Phe)INK. (B) Extracted single ion chromatograms (XIC) of the natural amino acid mutants Y, W, F and OCF<sub>3</sub>Phe. Misincorporation of the natural amino acids Tyr, Trp and Phe is undetectable within the dynamic range of the experiment.

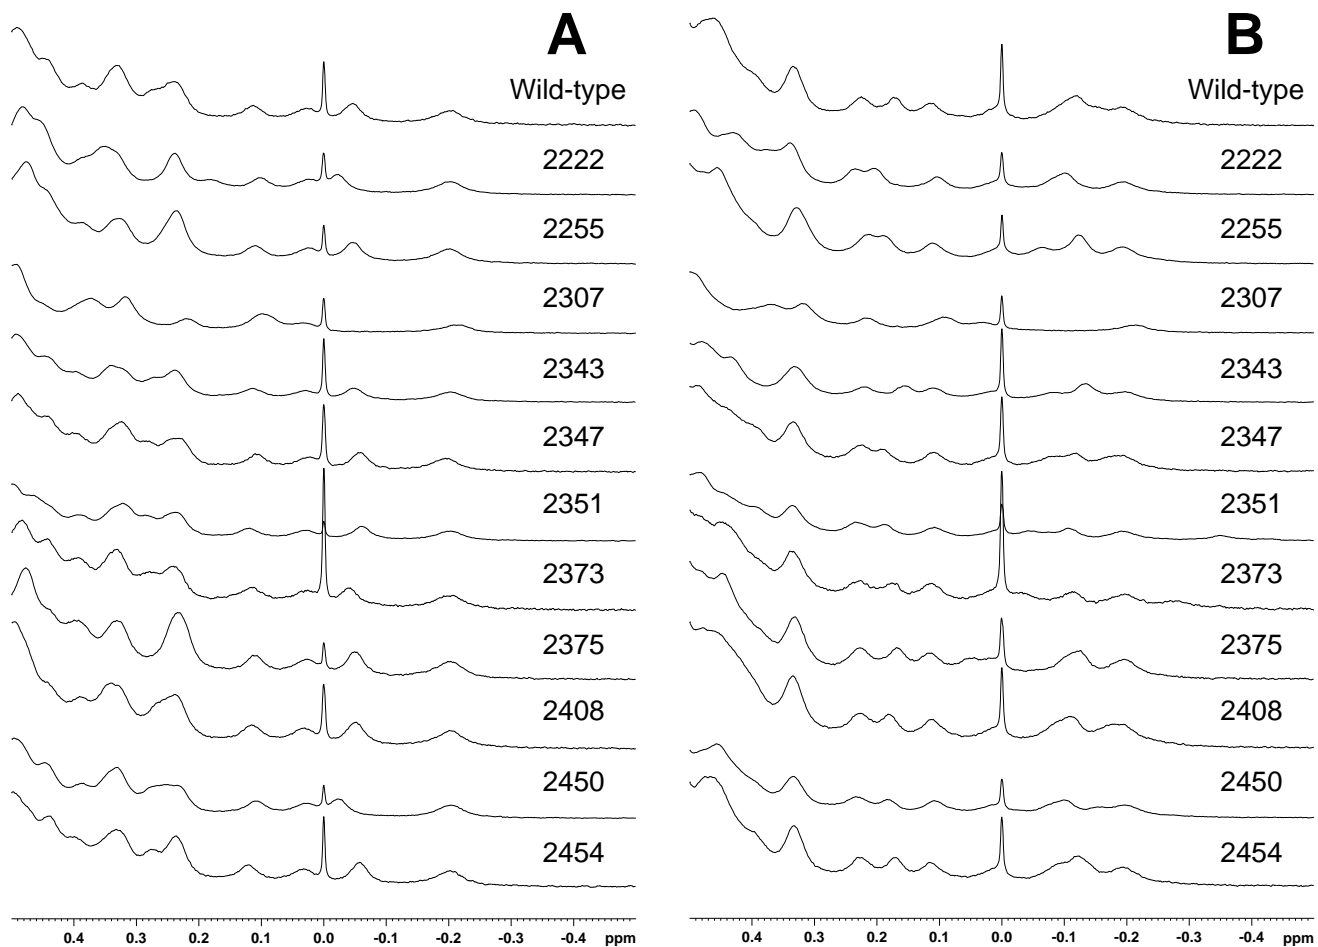

**Figure S4.**  $^1\text{H}$  NMR of  $^{13}\text{C}/^{15}\text{N}$ -OMePhe mutants with before (A) and after addition of tool compound (B).



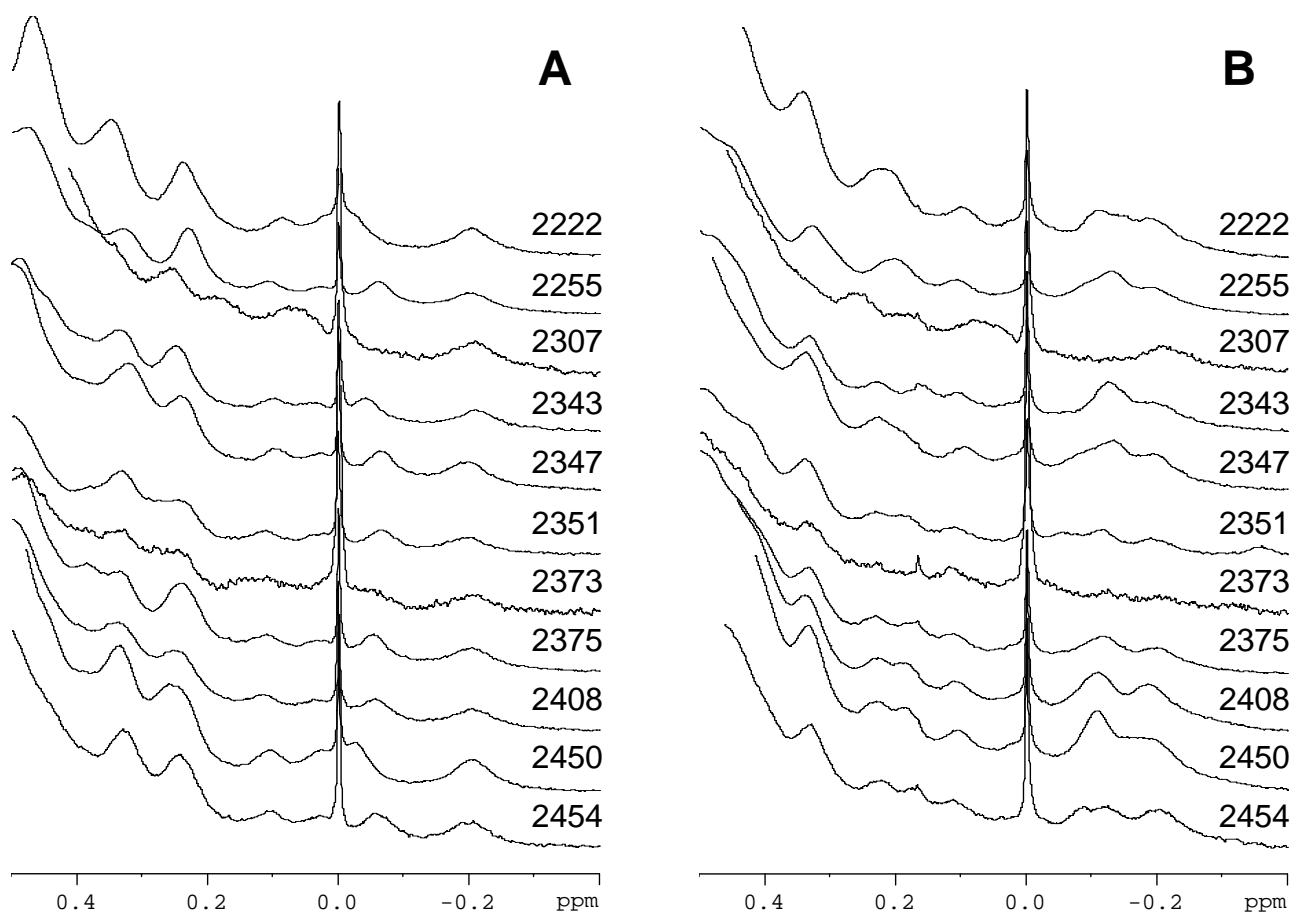

**Figure S5.**  $^1\text{H}$  NMR of  $\text{OCF}_3\text{Phe}$  mutants before (A) and after addition of tool compound (B).

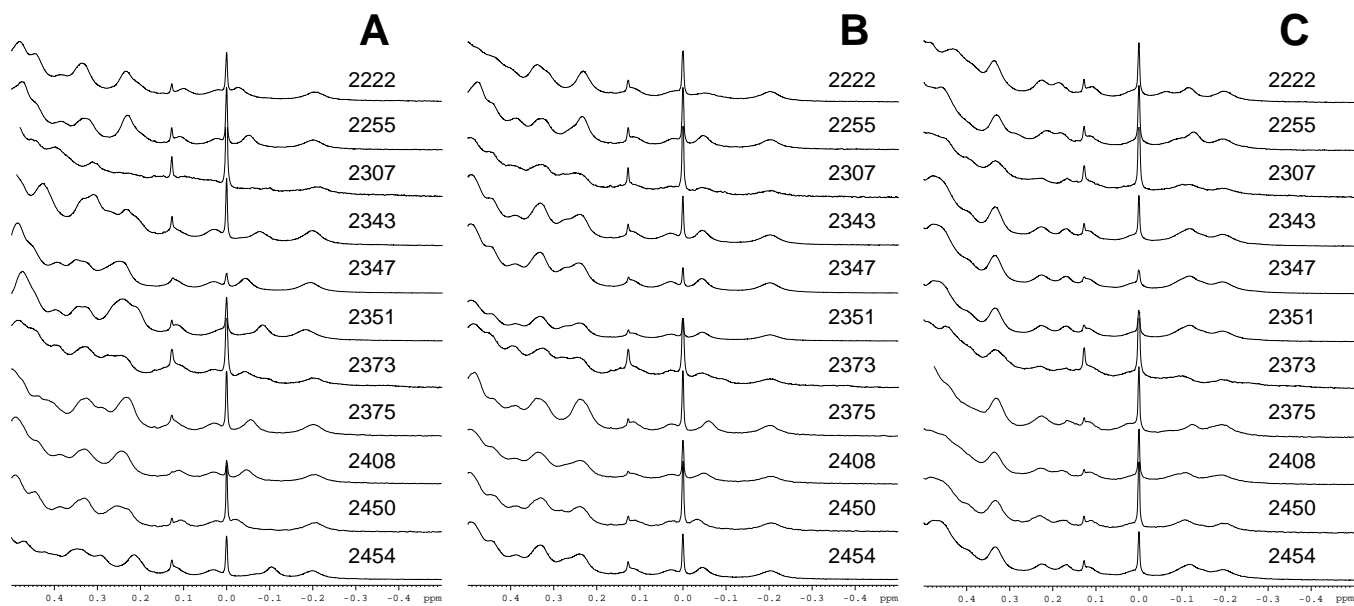

**Figure S6.**  $^1\text{H}$  NMR of  $^{15}\text{N}$ -oNBTyr mutants before (A) and after UV cleavage (B) and after addition of tool compound (C).

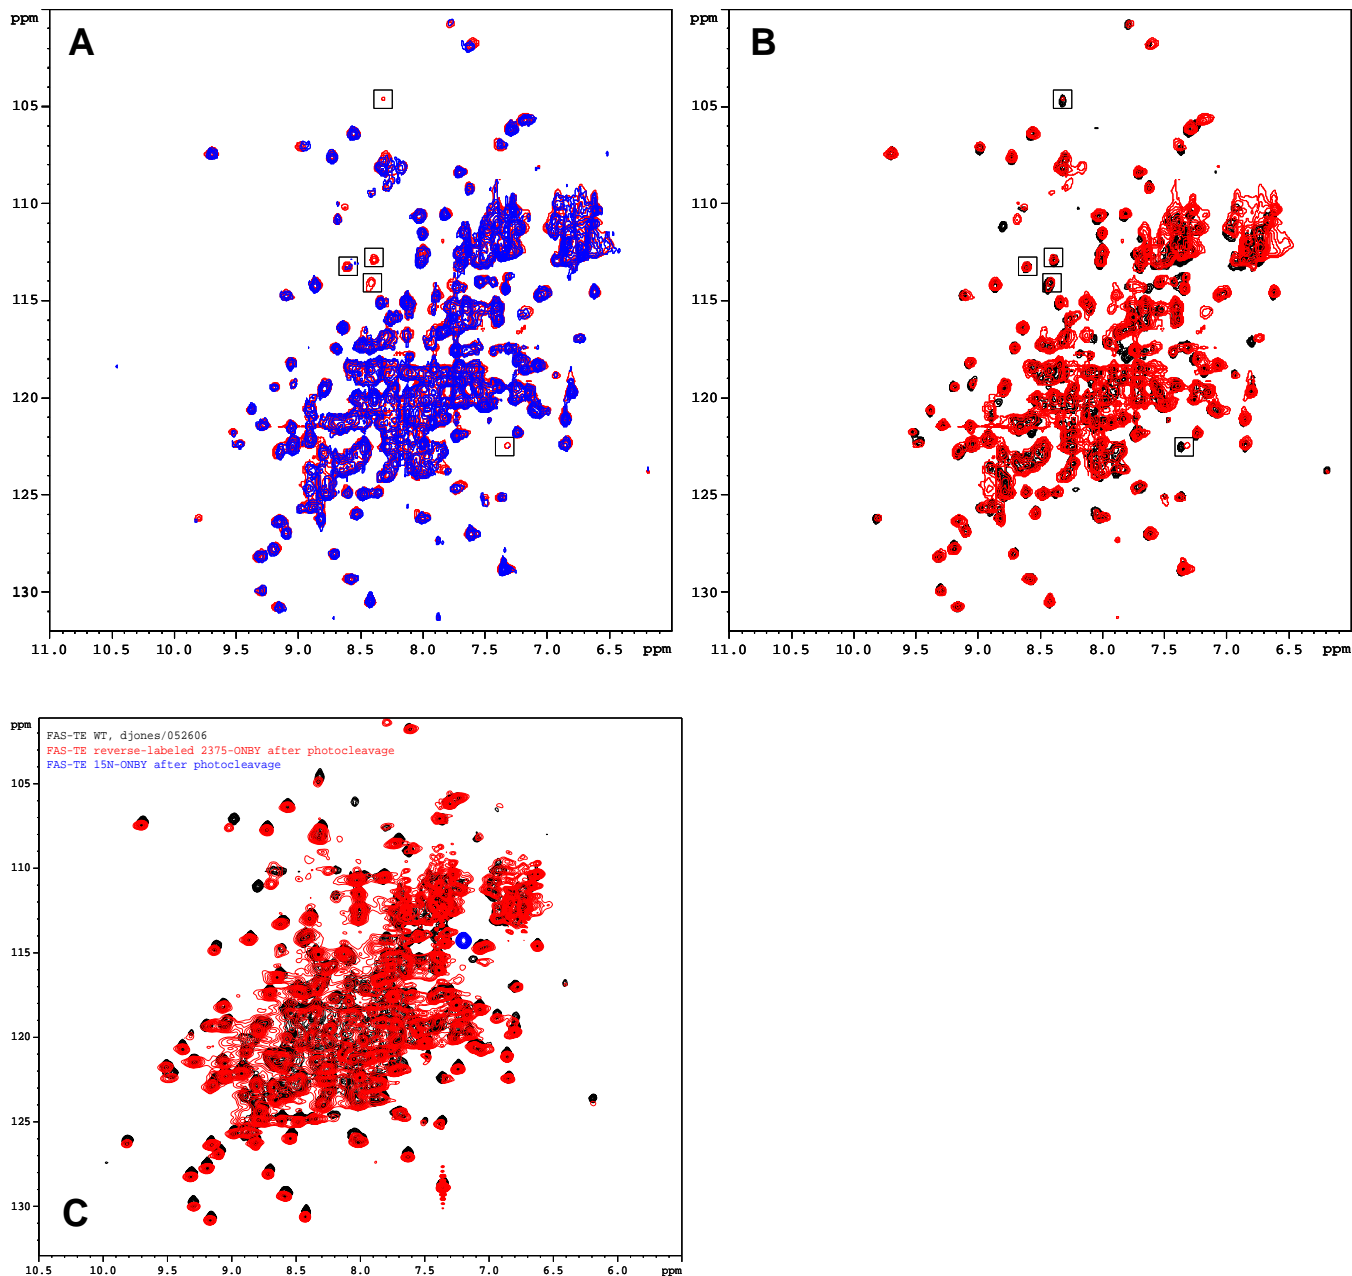

**Figure S7.** Reverse labeled samples indicating structural integrity of FAS-TE mutants. A) Overlay of  $^1\text{H}$ - $^{15}\text{N}$  HSQC spectra of  $^{15}\text{N}$ -labeled FAS-TE with unlabeled oNBtyr incorporated in place of Tyr-2343 before (blue) and after (red) UV-illumination; B) Overlay of UV-cleaved Tyr-2343-oNBtyr FAS-TE (red) with wild-type FAS-TE (black); C) Overlay of UV-cleaved Tyr-2375-oNBtyr mutant (blue) with the spectrum of uniformly  $^{15}\text{N}$ -labeled wild-type FAS-TE (black) and UV-cleaved  $^{15}\text{N}$ -labeled Phe-2375-oNBtyr produced with unlabeled oNBtyr. As expected, the resonance peak of Tyr-2375 is missing from the wild-type spectrum (Phe-2375) and from the reverse labeled Phe-2375-oNBtyr sample but the rest of the spectrum is almost identical.

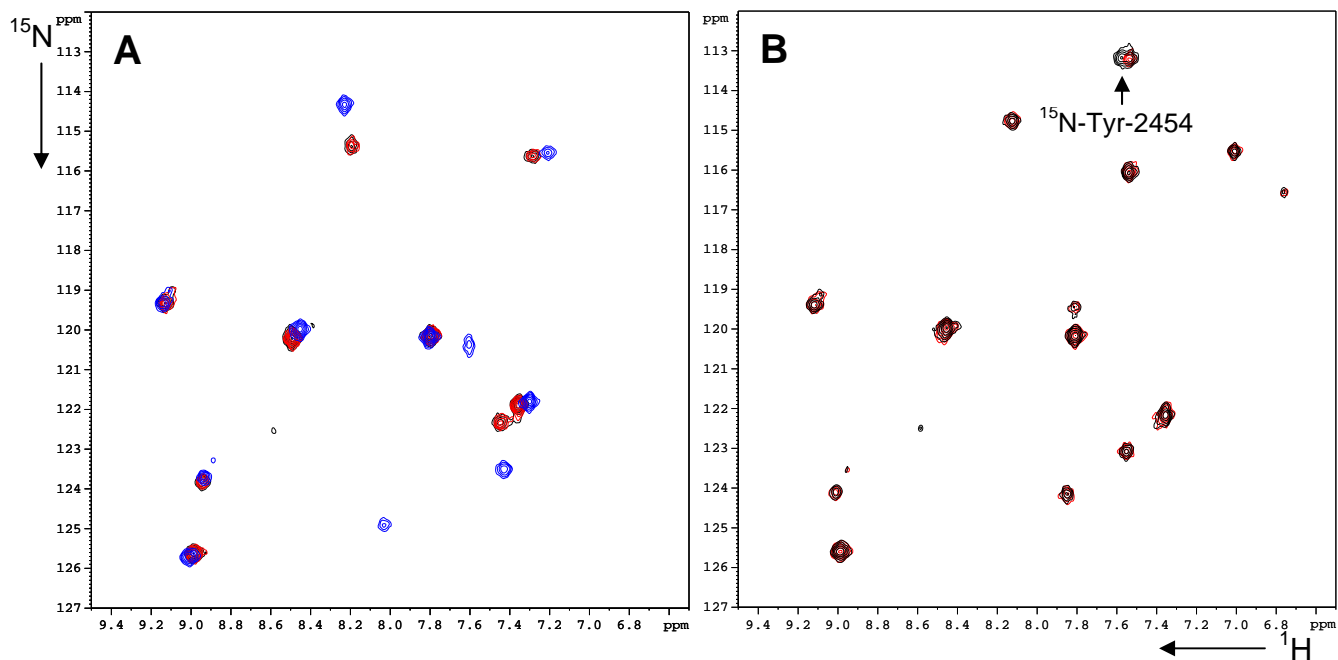

**Figure S8.** Wild-type and Tyr-2454-oNBtyr mutant FAS-TE are structurally similar. A) Overlay of  $^1\text{H}$ - $^{15}\text{N}$  HSQC data for wild-type protein selectively labeled with  $^{15}\text{N}$ -tyrosine (black) and Tyr-2454-oNBtyr selectively labeled with  $^{15}\text{N}$ -tyrosine and unlabeled oNBtyr at position 2454 before (blue) and after UV-cleavage (red). B) Overlay of wild-type protein (black) and of Tyr-2454-oNBtyr (red) after the addition of tool compound. The wild-type protein has one extra peak for Tyr-2454 that is unlabeled in the Tyr-2454-oNBtyr sample.

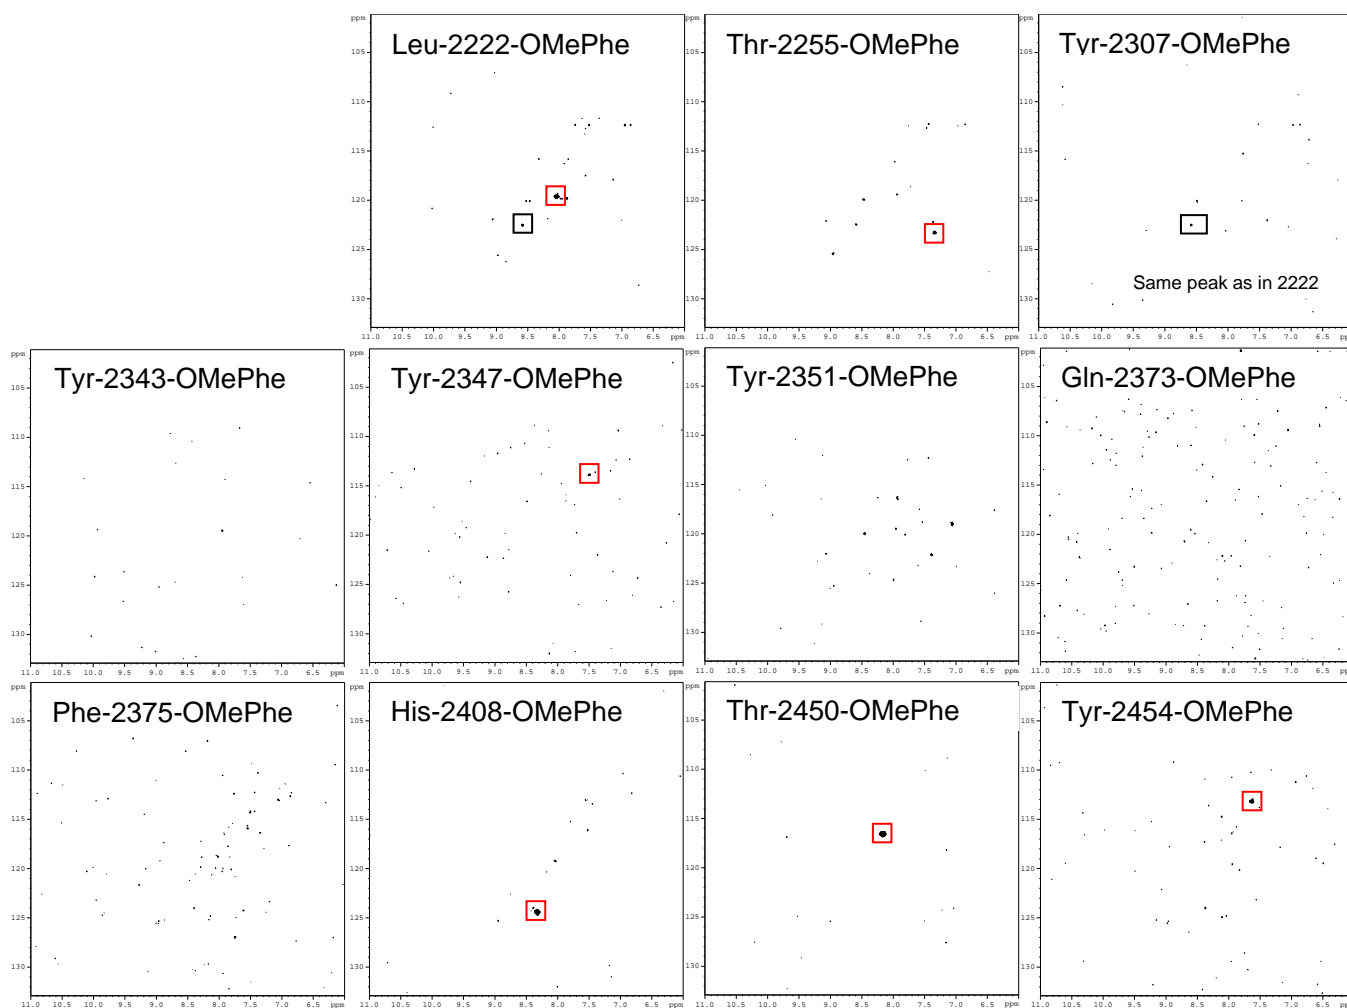

**Figure S9.**  $^1\text{H}$ - $^{15}\text{N}$  HSQC spectra of FAS-TE mutants with  $^{13}\text{C}/^{15}\text{N}$ -labeled OMePhe incorporated at 11 different positions after the addition of four molar equivalent of tool compound. Only six of the 11 mutants show a clear single amide resonance peak (Leu-2222-OMePhe, Thr-2255-OMePhe, Tyr-2347-OMePhe, His-2408-OMePhe, Thr-2450-OMePhe and Tyr-2454-OMePhe) after addition of tool compound.
